# Supplementary material
Source: publisher figshare collection journal article supplement (https://gsapubs.figshare.com/ndownloader/files/22747070)
Supplement: Supplementary file 1 [file 22747070]

## Little Ice Age Drought in Equatorial Africa: ITCZ Migrations and ENSO Variability

J. M. Russell  
T. C. Johnson

Supplementary Online Data:  $^{14}\text{C}$  and  $^{210}\text{Pb}$  data for cores E72-4P and E03-1G, Lake Edward, Uganda

Table DR1. Radiocarbon dates from core Edw-4. Dates beginning with AA were analyzed at the University of Arizona, and dates beginning with OS were analyzed at the NOSAMS facility and Wood's Hole Oceanographic Institution. All  $^{14}\text{C}$  ages were determined on fine-grained terrestrial macrofossils, primarily charcoal and wood fragments. These fossils were isolated from bulk sediment samples by sieving, followed by hand-picking macrofossils from other coarse-grained particles using a dissecting microscope at 20X magnification.

| Lab #    | Depth in core (cm) | $\text{C}^{14}$ Age | Error | Calendar age |
|----------|--------------------|---------------------|-------|--------------|
| AA67028  | 17.5               | 53                  | 36    | 0            |
| AA67024  | 51.5               | 140                 | 51    | 142          |
| OS-49963 | 53.5               | 515                 | 40    | 532          |
| AA67022  | 90                 | 218                 | 54    | 287          |
| AA67027  | 101                | 348                 | 38    | 352          |
| OS-49958 | 107                | 880                 | 40    | 777          |
| OS-49960 | 137                | 575                 | 50    | 612          |
| OS-49957 | 176                | 870                 | 55    | 784          |
| OS-49959 | 187                | 1060                | 40    | 959          |
| AA67025  | 207.5              | 852                 | 59    | 739          |
| AA67023  | 270                | 1036                | 48    | 938          |
| OS-49956 | 277                | 1330                | 55    | 1276         |
| AA67026  | 301.5              | 1081                | 37    | 969          |
| OS-50147 | 383                | 1270                | 35    | 1204         |
| OS-27159 | 512                | 1560                | 45    | 1417         |

### **$^{210}\text{Pb}$ Dating**

Core E03-1G was extruded in the field in 1-cm intervals and dated using  $^{210}\text{Pb}$ . The  $^{210}\text{Pb}$  chronology was determined by measuring  $^{210}\text{Pb}$  activity through its granddaughter product  $^{210}\text{Po}$  at 15 intervals within the 53 cm sediment core with  $^{209}\text{Po}$  added as an internal tracer. 0.25 and 1.5 grams of dry sediments were pretreated with concentrated HCl, then Po isotopes were distilled at 550°C and plated onto silver discs from a 0.5 N HCl solution. Activity was measured by alpha spectroscopy with an EG&G Nuclear system. Unsupported  $^{210}\text{Pb}$  was calculated by

subtracting supported activity from the total activity at each level, with supported  $^{210}\text{Pb}$  activity calculated from the activity at the base of the core. Dates and sedimentation rates were determined according to the constant rate of supply model (Appleby and Oldfield, 1978). Dating was performed at the Science Museum of Minnesota's St. Croix Watershed Research Station.

Table DR2. Depth, Unsupported  $^{210}\text{Pb}$  activity, and age for each sample measured in E03-1G. Supported activity, determined at the base of the core, was  $1.0028 \pm .0337$  pCi/g.

| Depth at<br>Interval<br>(cm) | Unsup.<br>Activity<br>(pCi/g) | Error of<br>Unsup. Act.<br>( $\pm$ s.d.) | Cum. Act.<br>below Int.<br>(pCi/cm2) | Date<br>A.D. | Error of<br>Age<br>( $\pm$ s.d.) |
|------------------------------|-------------------------------|------------------------------------------|--------------------------------------|--------------|----------------------------------|
| 2                            | 11.0298                       | 0.3747                                   | 22.0192                              | 2002.1       | 0.99                             |
| 6                            | 10.8460                       | 0.5303                                   | 19.7103                              | 1998.5       | 1.04                             |
| 10                           | 11.3640                       | 0.4888                                   | 16.6005                              | 1993.0       | 1.14                             |
| 14                           | 10.7321                       | 0.5325                                   | 13.1071                              | 1985.4       | 1.31                             |
| 16                           | 9.2296                        | 0.4524                                   | 11.2919                              | 1980.6       | 1.45                             |
| 18                           | 8.3782                        | 0.3665                                   | 9.6139                               | 1975.5       | 1.64                             |
| 20                           | 7.4250                        | 0.3547                                   | 7.9090                               | 1969.2       | 1.91                             |
| 22                           | 5.6193                        | 0.2651                                   | 6.6010                               | 1963.4       | 2.18                             |
| 26                           | 4.0984                        | 0.1457                                   | 4.5212                               | 1951.2       | 2.55                             |
| 30                           | 3.4017                        | 0.1445                                   | 2.8771                               | 1936.7       | 3.67                             |
| 31                           | 3.2305                        | 0.1531                                   | 2.4956                               | 1932.2       | 4.21                             |
| 35                           | 1.8296                        | 0.0945                                   | 1.4030                               | 1913.7       | 4.97                             |
| 39                           | 1.3827                        | 0.0926                                   | 0.6771                               | 1890.3       | 9.43                             |
| 43                           | 0.4825                        | 0.0561                                   | 0.2392                               | 1856.9       | 12.51                            |
| 47                           | 0.1651                        | 0.0498                                   | 0.0644                               | 1814.7       | 25.61                            |

Figure DR1. Unsupported  $^{210}\text{Pb}$  activity (right), cumulative unsupported  $^{210}\text{Pb}$  activity (center), and age modeled using the constant rate of supply model (right).

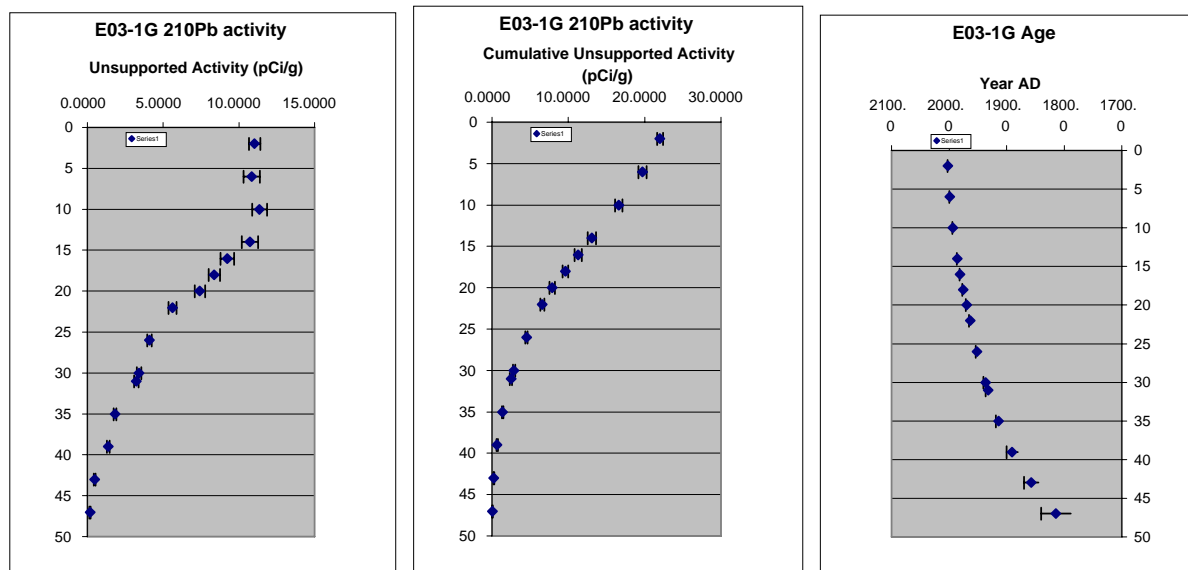

### References:

Appleby, P.G., and Oldfield, F., 1978, The calculation of lead-210 dates assuming a constant rate of supply of unsupported 210Pb to the sediments: *Cantena*, v. 5, p. 1-8.
